# Supplementary figures and images for: Characteristics of Microsatellites Mined from Transcriptome Data and the Development of Novel Markers in Paeonia lactiflora
Source: MDPI journal article supplement (doi:10.3390/genes11020214), 2020-02-19

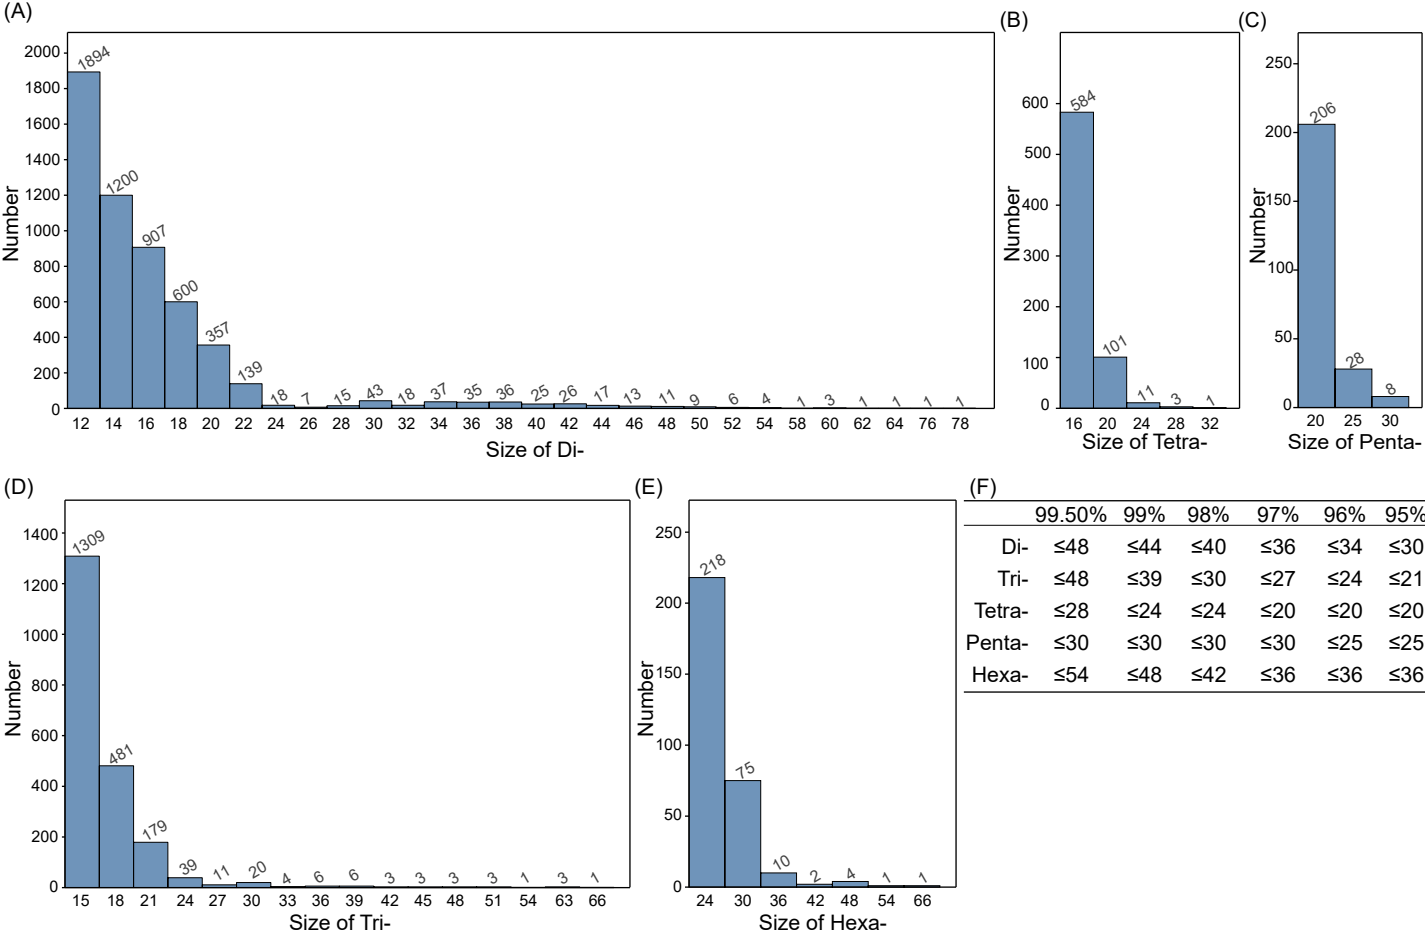

Supplement: s1 [file s1]

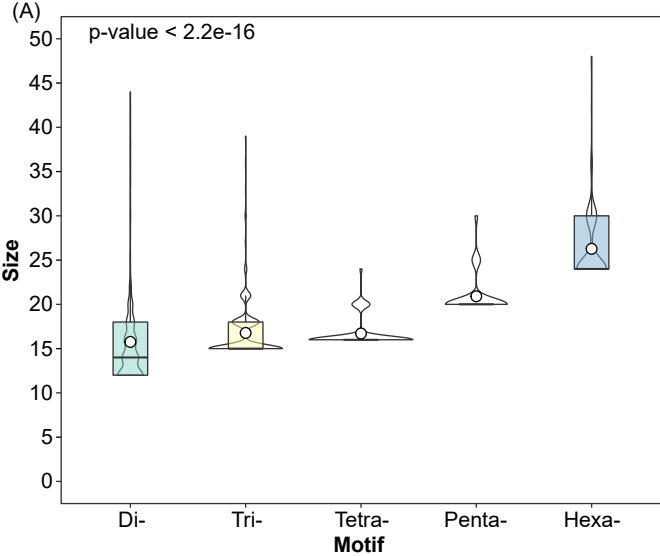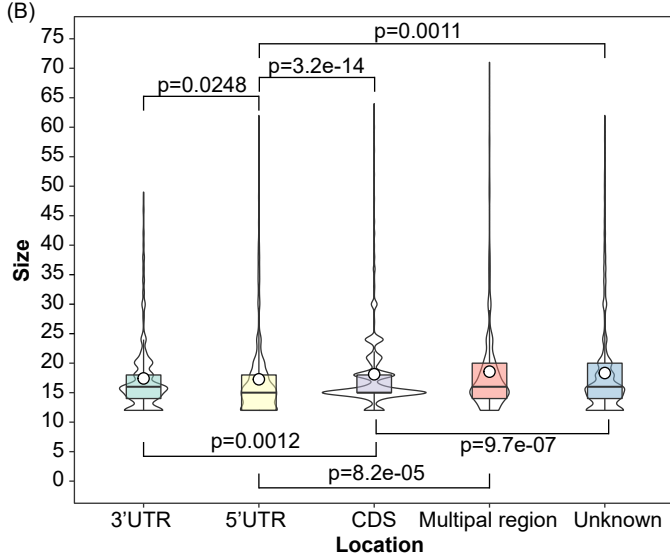

Supplement: s1 [file s1]

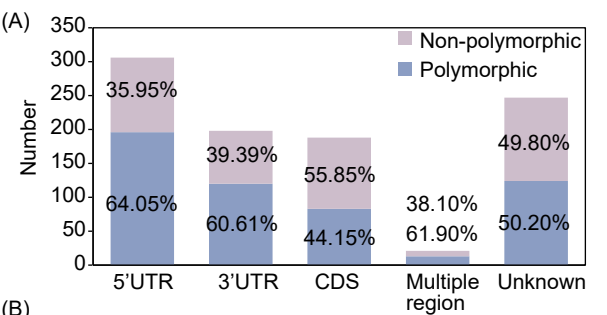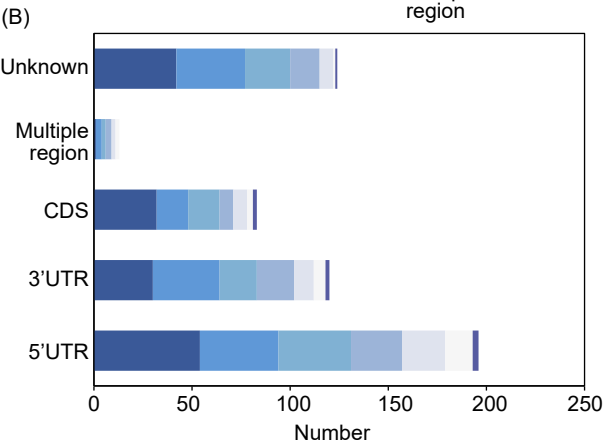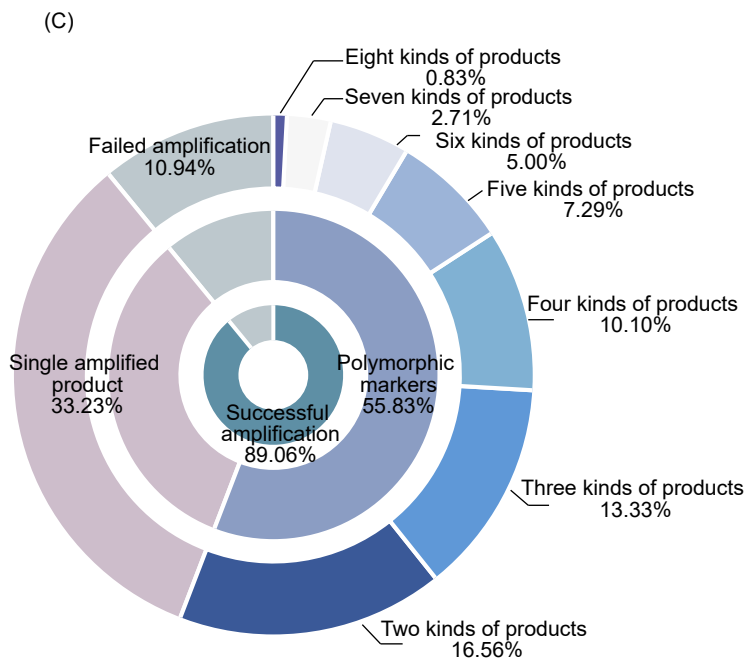

Supplement: s1 [file s1]
